# Supplementary material for: Formation of Superhydrophobic Coatings Based on Dispersion Compositions of Hexyl Methacrylate Copolymers with Glycidyl Methacrylate and Silica Nanoparticles
Source: MDPI journal article supplement (doi:10.3390/polym16213094), 2024-11-01
Supplement: s1 [file s1]

**Table S1** – Results of measurements of average initial wetting angles and average roll-off angles for composite coatings based on poly-(HMA-co-GMA).

| No. | Concentration of copolymer in the organic phase, wt. % | Filler/polymer binder mass fraction ratio, $W_f/W_p$ | Contact angle, deg | Roll-off angle, deg |
|-----|--------------------------------------------------------|------------------------------------------------------|--------------------|---------------------|
| 1   | 5                                                      | 0                                                    | 91.65±1.5          | -                   |
| 2   |                                                        | 0.4                                                  | 152.95±2.5         | 12.29±1.5           |
| 3   |                                                        | 0.8                                                  | 156.64±2           | 9.96±1              |
| 4   |                                                        | 1.2                                                  | 157.39±3           | 6.46±1              |
| 5   |                                                        | 1.6                                                  | 155.46±2.5         | 6.1±1               |
| 6   |                                                        | 2                                                    | 152.94±2.5         | 6.99±1              |
| 7   | 10                                                     | 0                                                    | 91.77±1.5          | -                   |
| 8   |                                                        | 0.4                                                  | 150.09±2           | 17.1±1.5            |
| 9   |                                                        | 0.8                                                  | 155.36±3           | 10.26±1.2           |
| 10  |                                                        | 1.2                                                  | 154.11±2.5         | 9.97±1              |
| 11  |                                                        | 1.6                                                  | 156.91±2           | 13.79±1.5           |
| 12  |                                                        | 2                                                    | 158.94±3           | 18.12±2             |
| 13  | 15                                                     | 0                                                    | 89.77±2            | -                   |
| 14  |                                                        | 0.4                                                  | 153.56±2.5         | 20.07±2.5           |
| 15  |                                                        | 0.8                                                  | 155.24±2           | 10.7±1              |
| 16  |                                                        | 1.2                                                  | 155.85±3           | 9.93±1              |
| 17  |                                                        | 1.6                                                  | 155.43±2.5         | 21.05±2             |
| 19  | 20                                                     | 0                                                    | 92.63±1            | -                   |
| 20  |                                                        | 0.4                                                  | 105.76±2.5         | -                   |
| 21  |                                                        | 0.8                                                  | 114.26±3           | -                   |
| 22  |                                                        | 1.2                                                  | 117.31±2.5         | -                   |
| 23  |                                                        | 1.6                                                  | 145.46±2           | -                   |

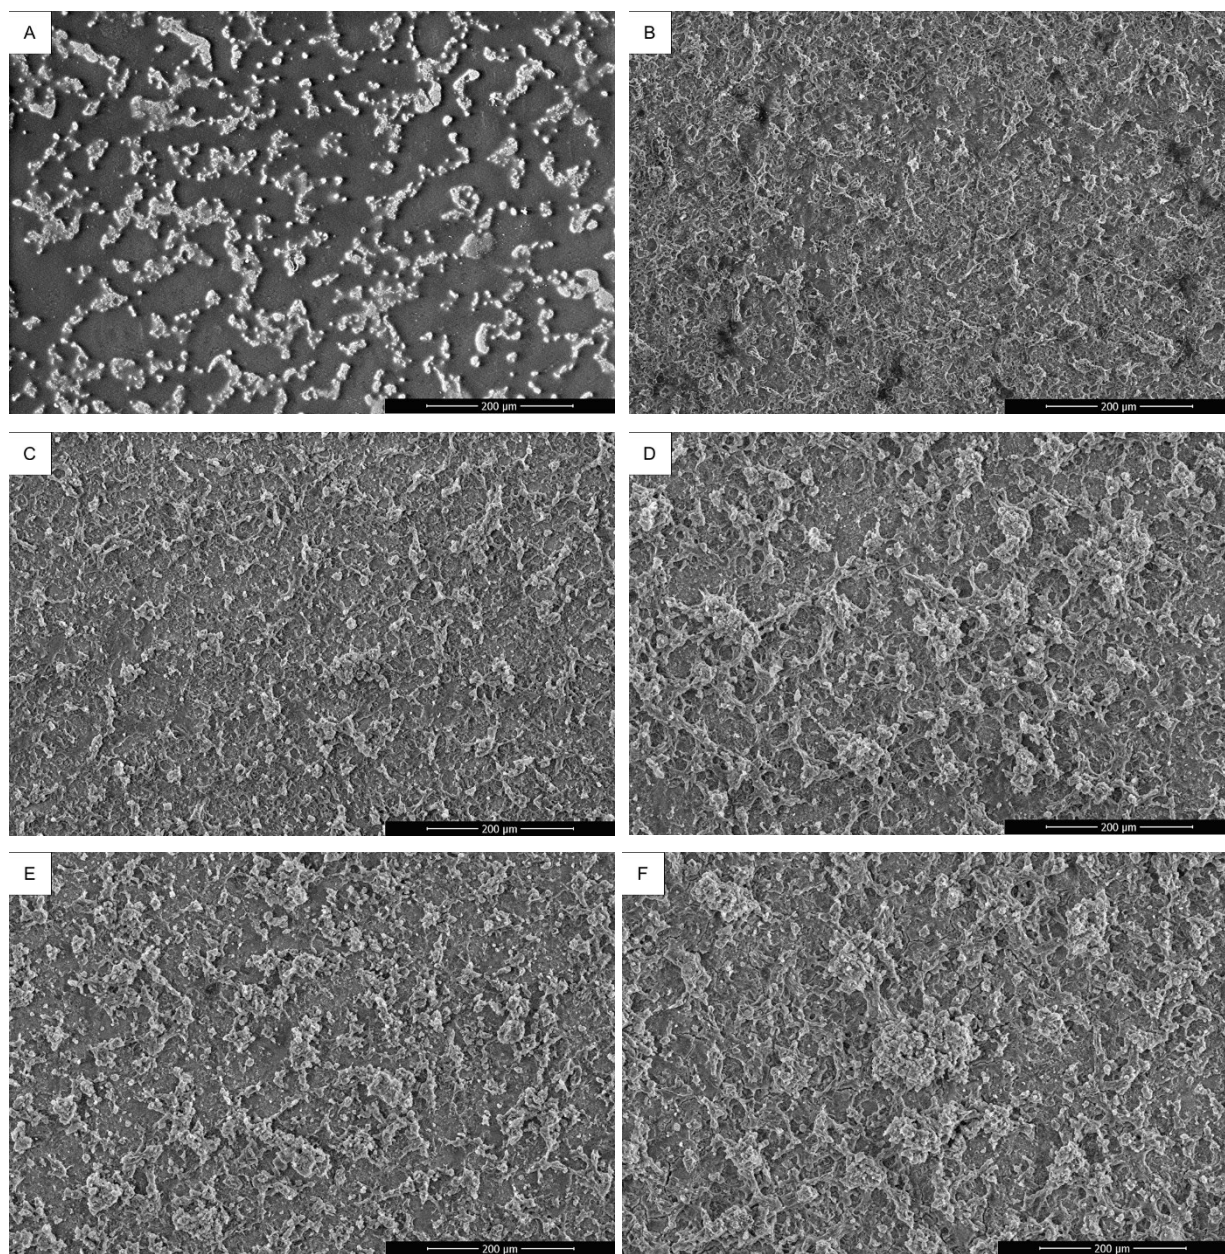

**Figure S1** – SEM images of coatings based on a 5 wt.% poly(HMA-co-GMA) solution. showing variations in the filler/polymer binder ratios: A – 0; B – 0.4; C – 0.8; D – 1.2; E – 1.6; F – 2.0 (500× magnification)

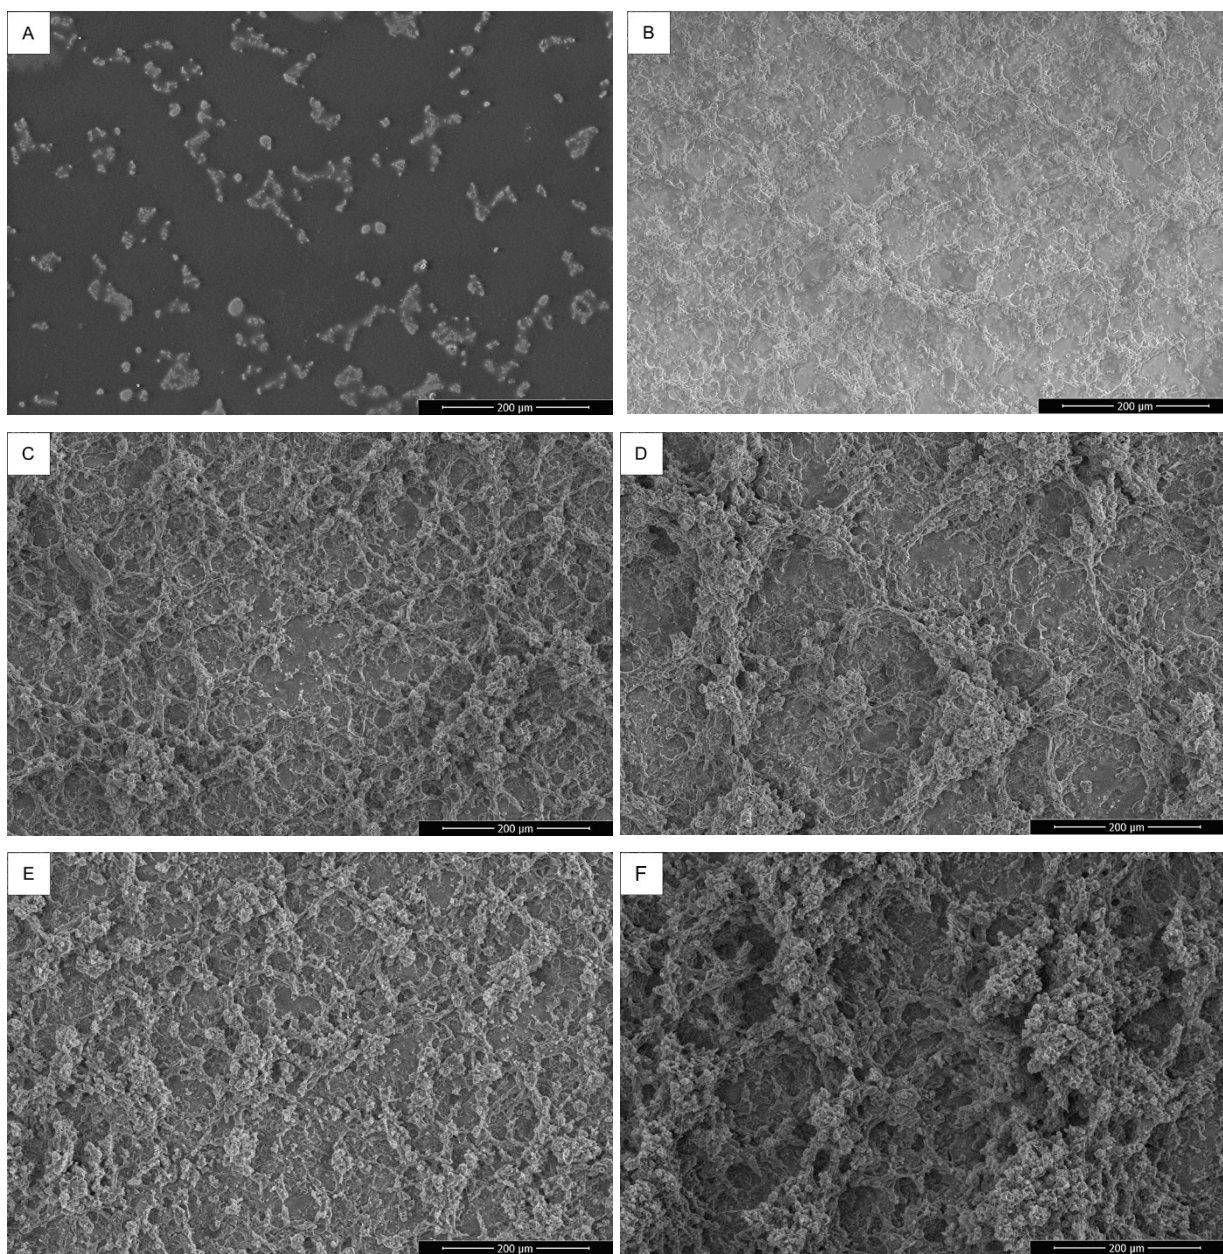

**Figure S2** – SEM images of coatings based on a 10 wt.% poly(HMA-co-GMA) solution. showing variations in the filler/polymer binder ratios: A – 0; B – 0.4; C – 0.8; D – 1.2; E – 1.6; F – 2.0 (500× magnification)

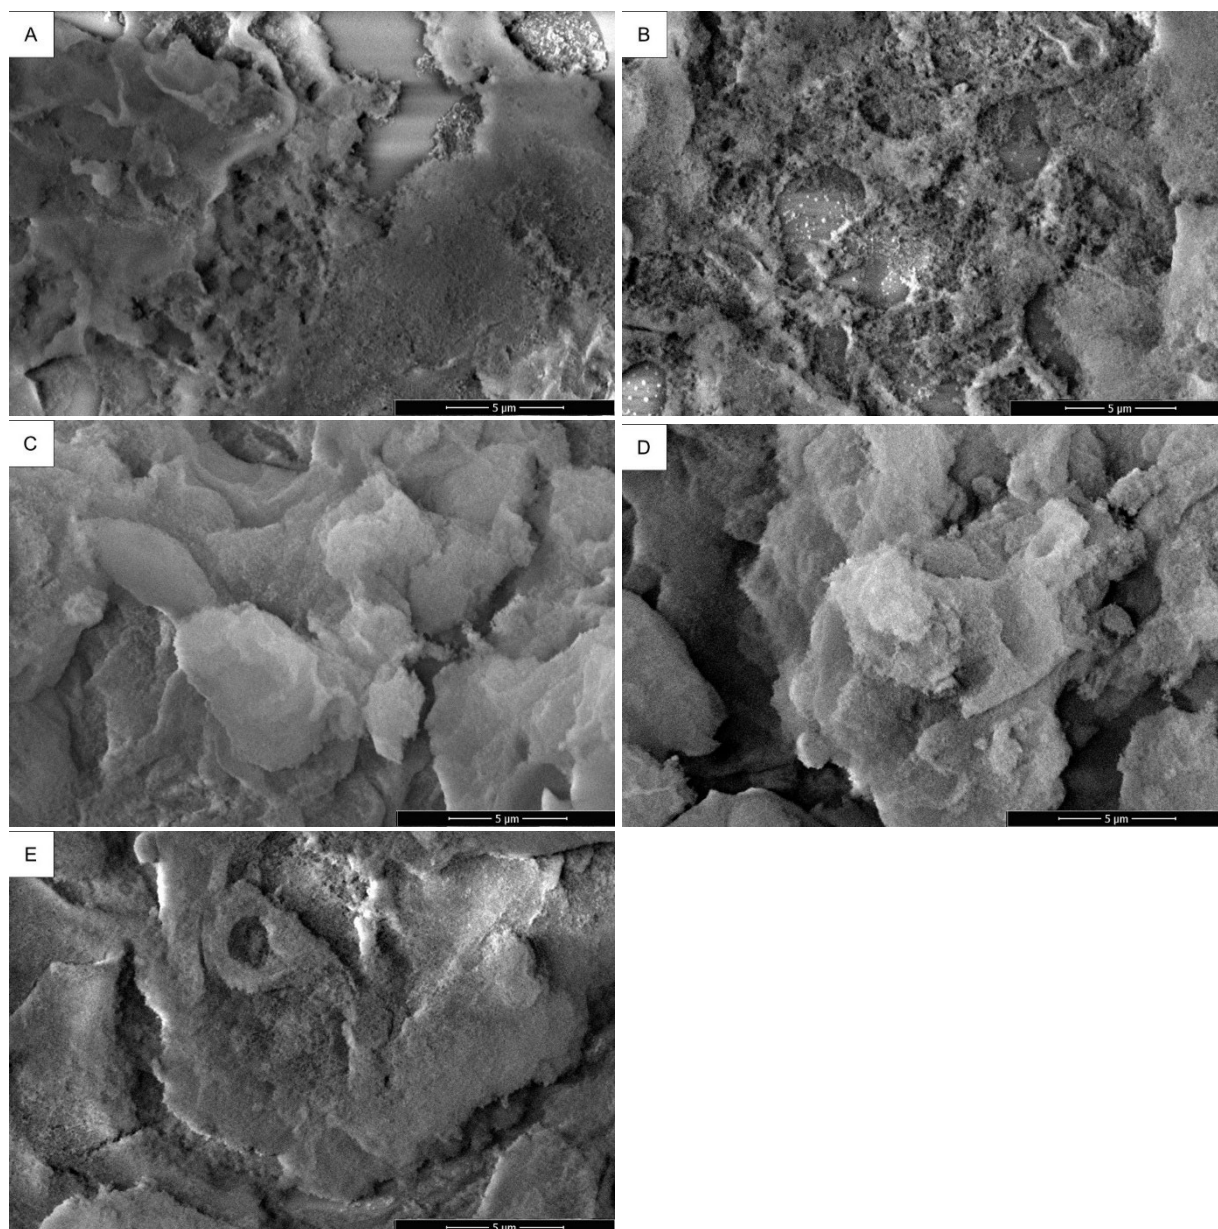

**Figure S3** – SEM images of coatings based on a 5 wt.% poly(HMA-co-GMA) solution. showing variations in the filler/polymer binder ratios: A – 0.4; B – 0.8; C – 1.2; D – 1.6; E – 2.0 (16000× magnification)

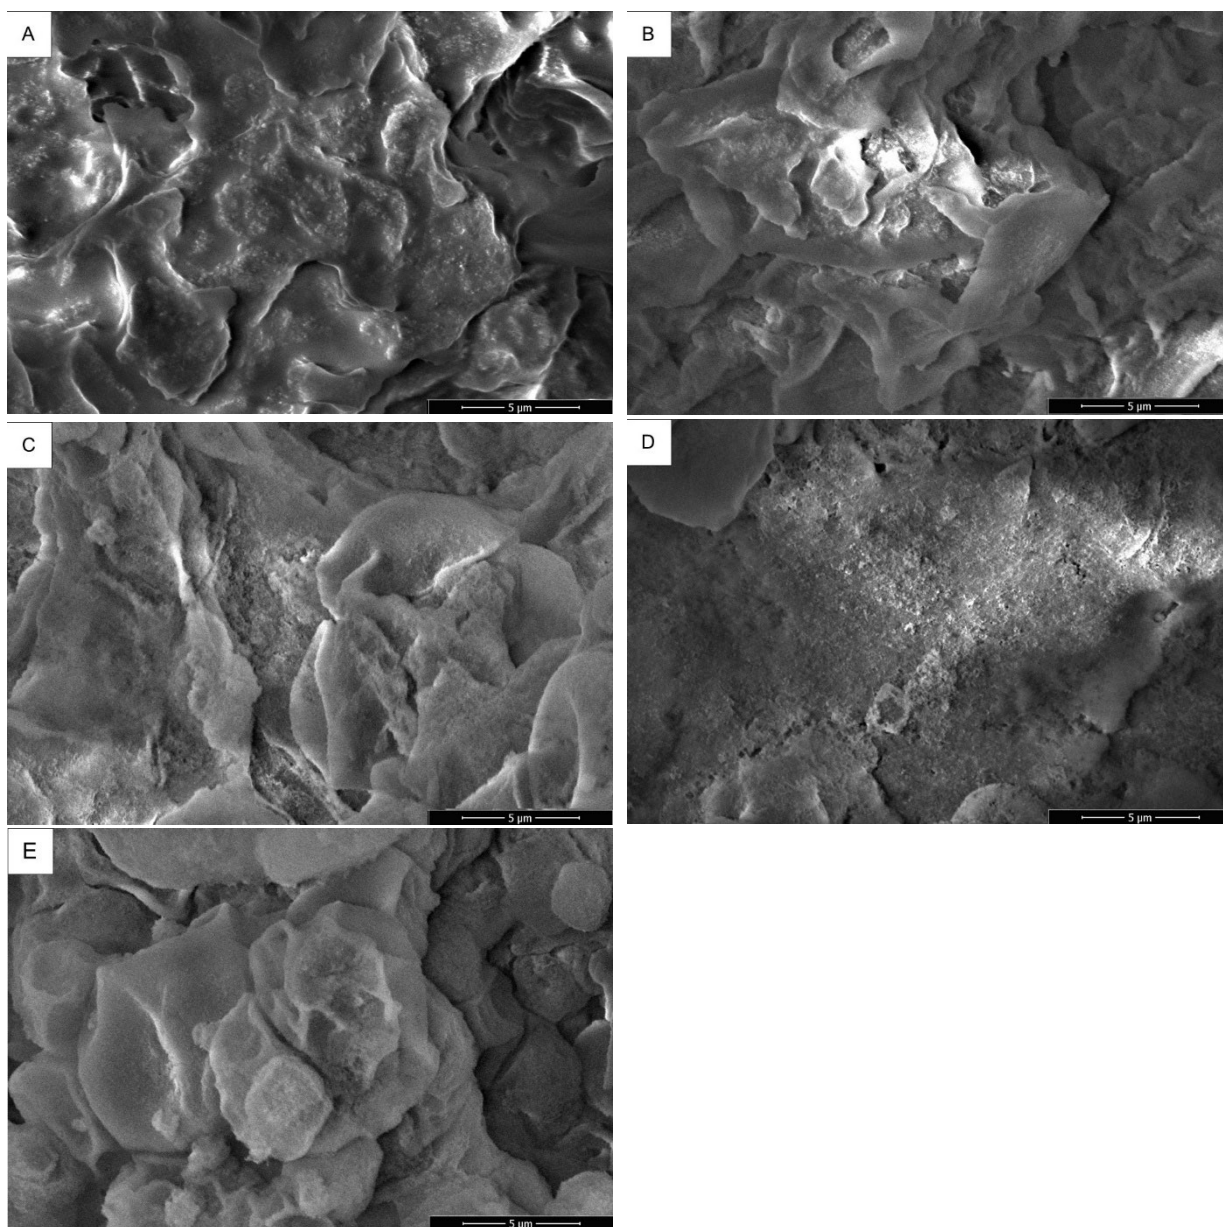

**Figure S4** – SEM images of coatings based on a 10 wt.% poly(HMA-co-GMA) solution, showing variations in the filler/polymer binder ratios: A – 0.4; B – 0.8; C – 1.2; D – 1.6; E – 2.0 (16000× magnification)



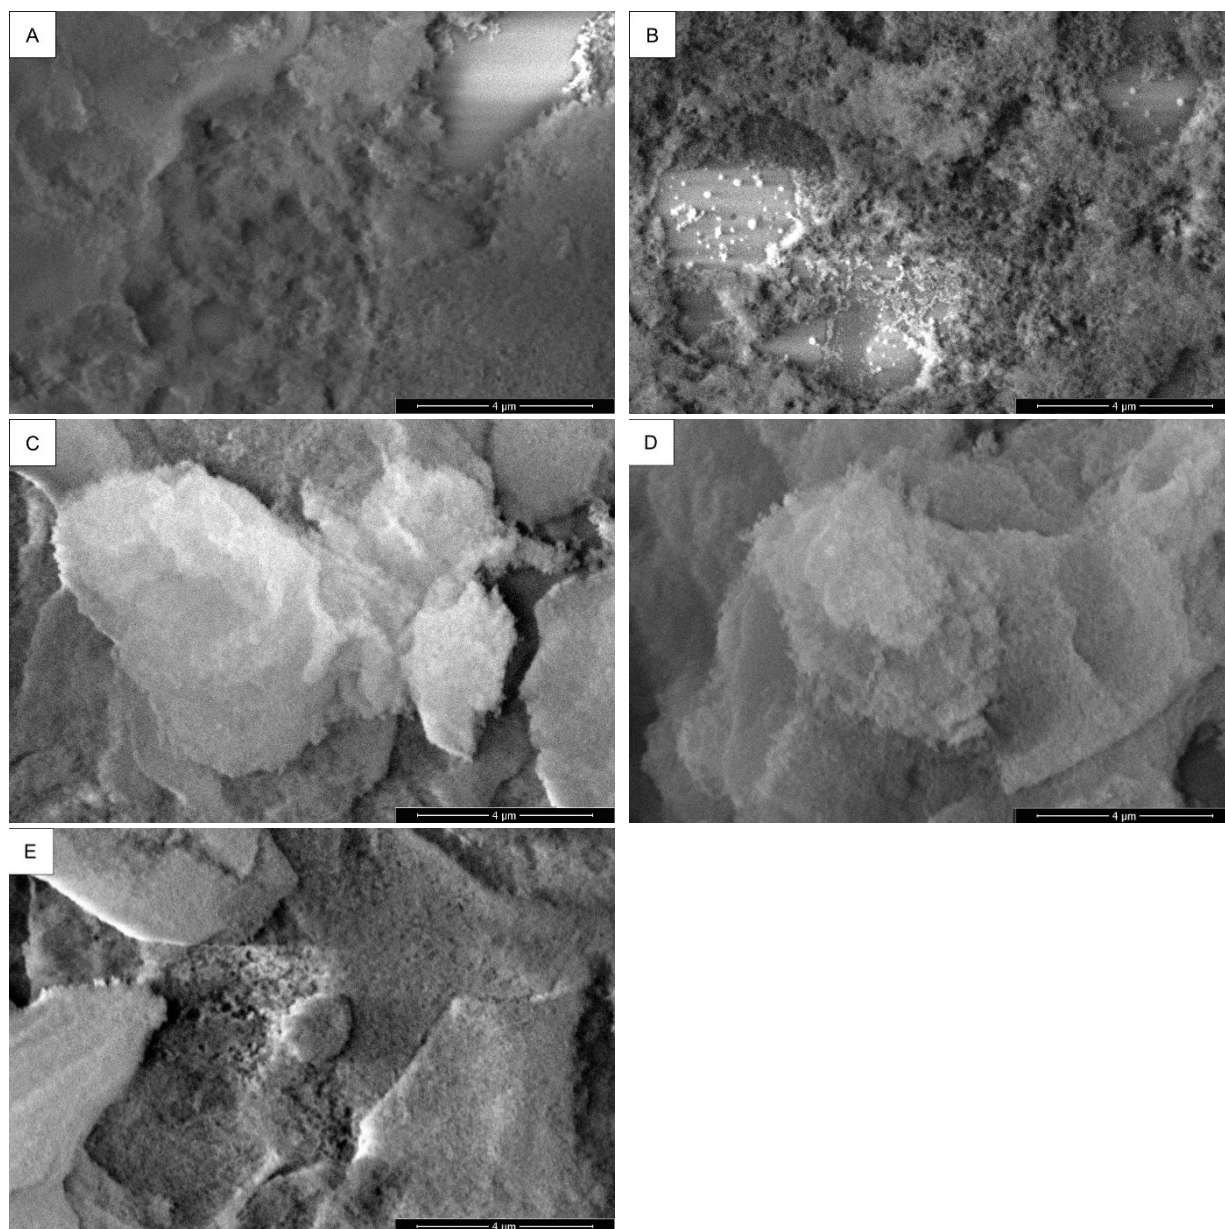

**Figure S5** – SEM images of coatings based on a 5 wt.% poly(HMA-co-GMA) solution. showing variations in the filler/polymer binder ratios: A – 0.4; B – 0.8; C – 1.2; D – 1.6; E – 2.0 (30000× magnification)

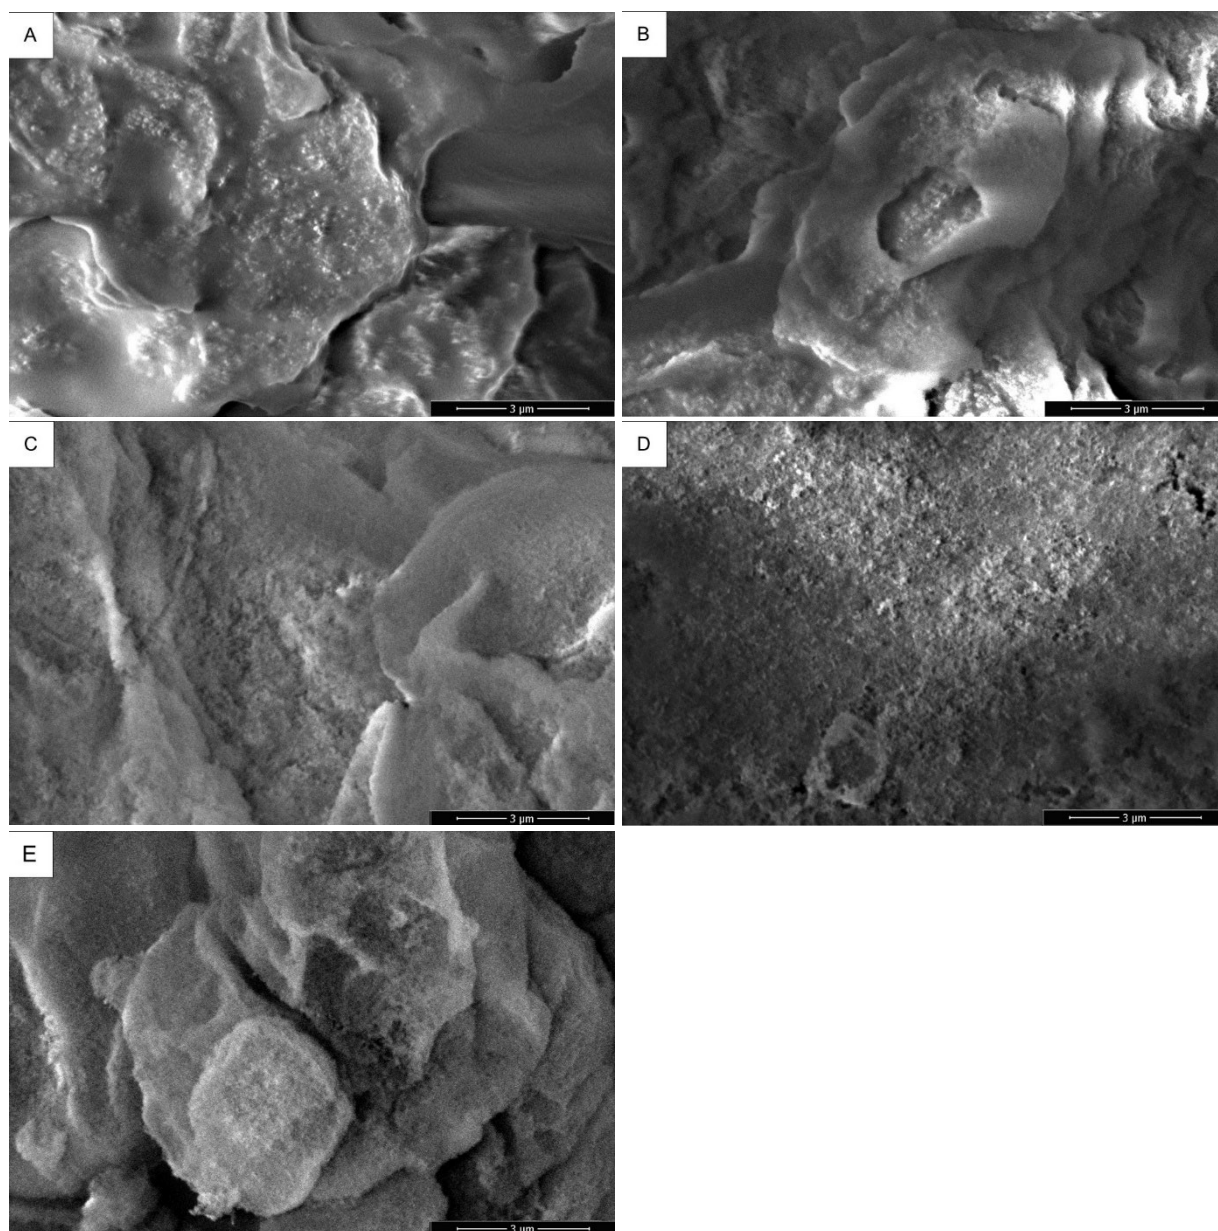

**Figure S6** – SEM images of coatings based on a 10 wt.% poly(HMA-co-GMA) solution. showing variations in the filler/polymer binder ratios: A – 0.4; B – 0.8; C – 1.2; D – 1.6; E – 2.0 (30000× magnification)

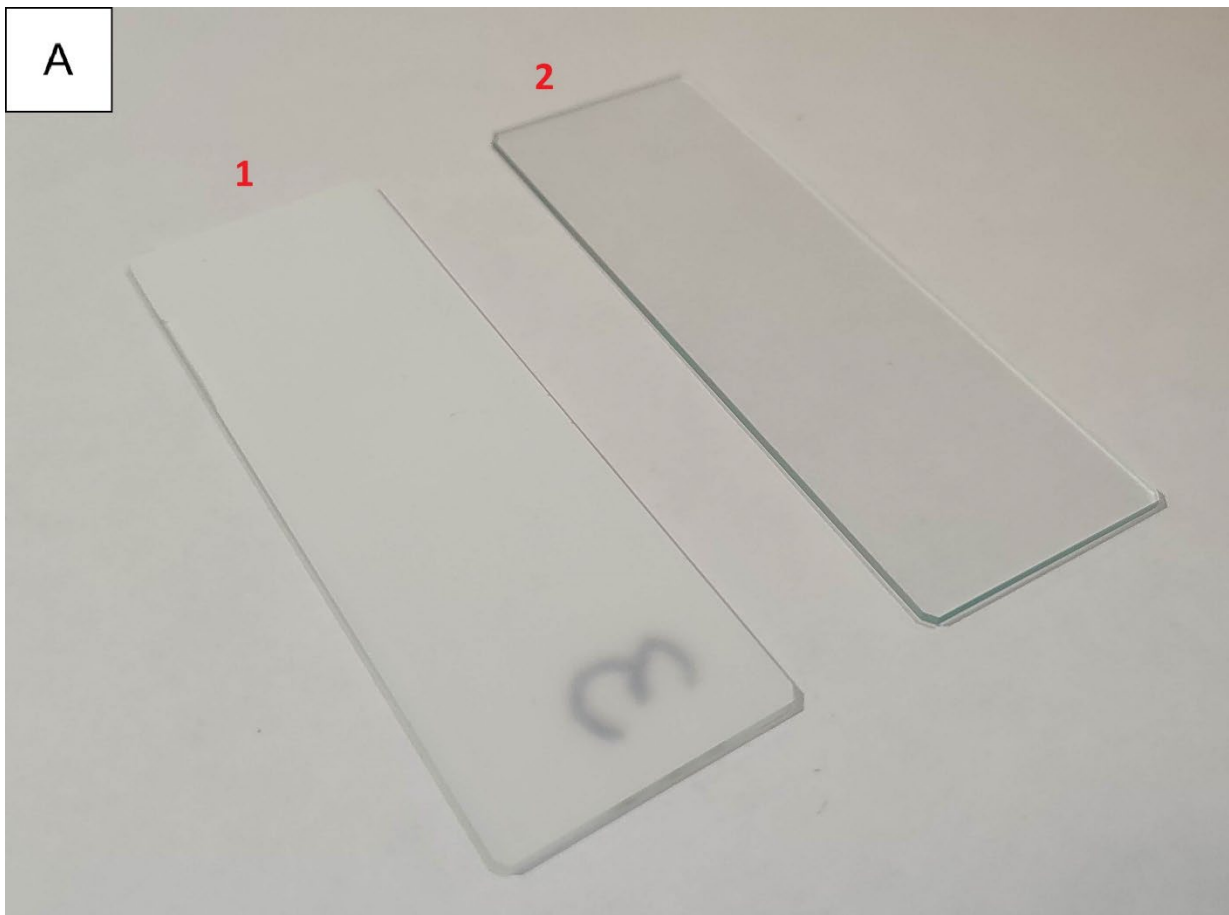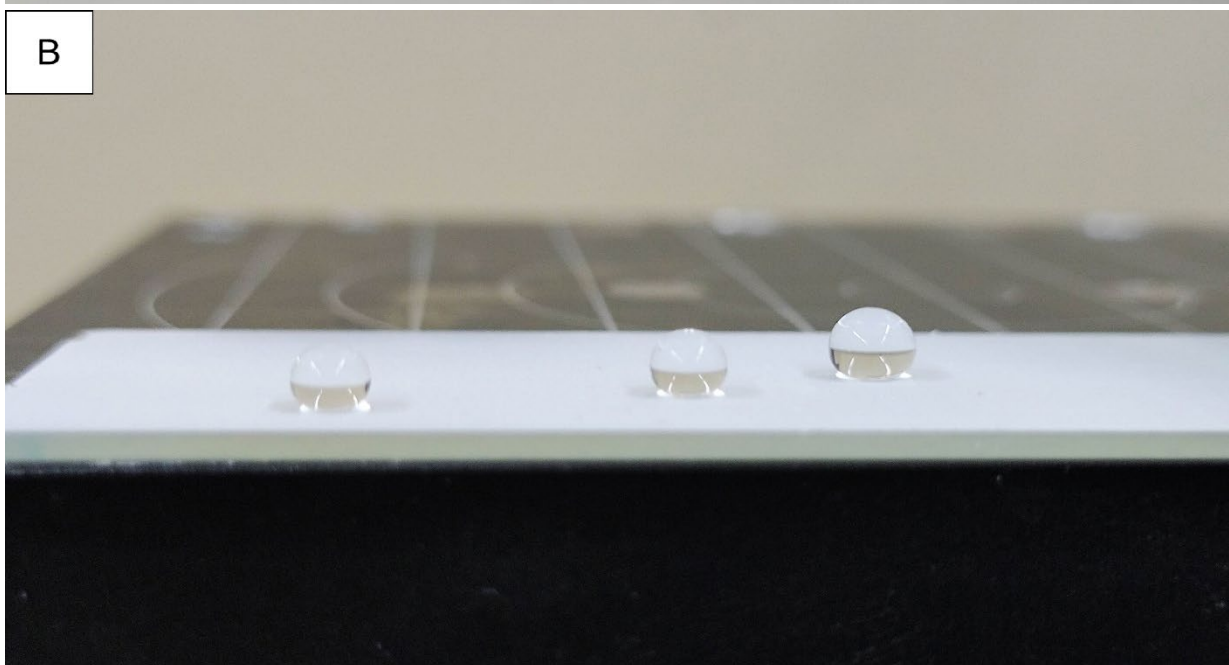



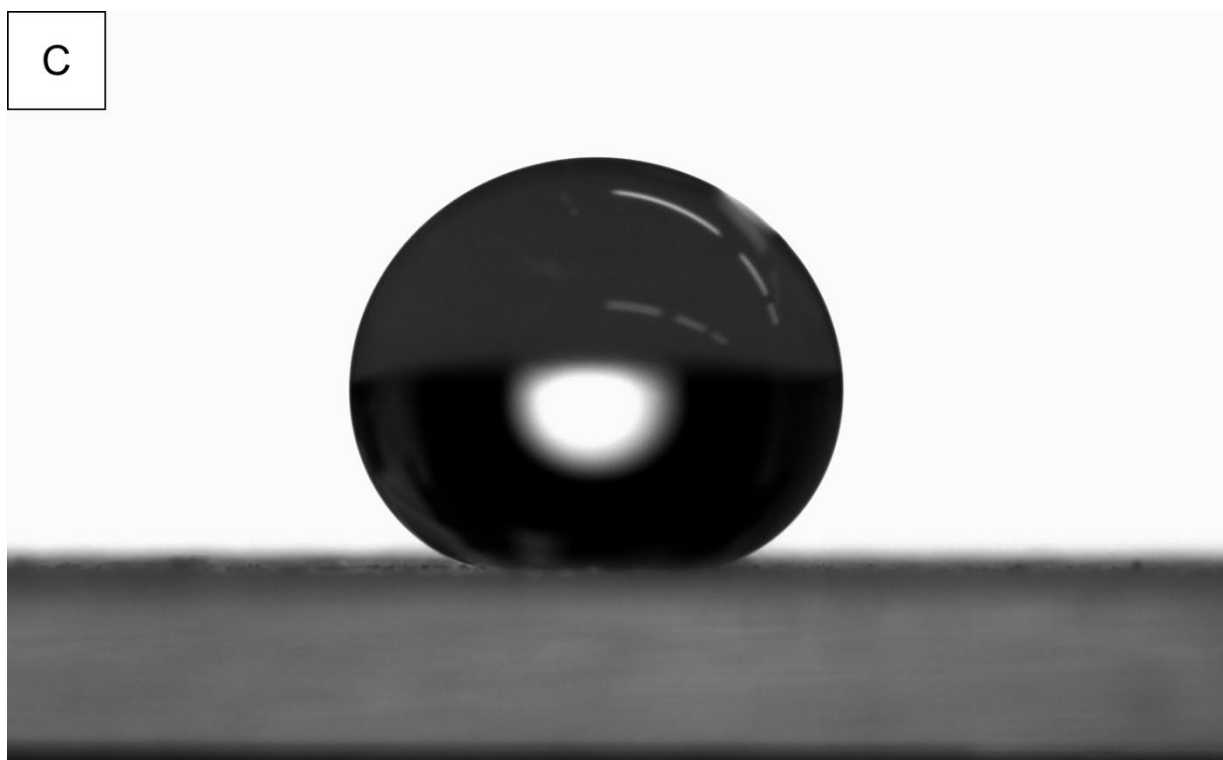

**Figure S7** – Image of composite coating: A - uncoated glass (right) and coated glass (left) based on 5 wt.% poly(HMA-co-GMA) solution with filler/polymer binder ratio equal to 1.2 ; B - water droplets on the surface of composite coating; C - profile of water droplet on the surface of composite coating.
